# Supplementary material for: BacSPaD: A Robust Bacterial Strains’ Pathogenicity Resource Based on Integrated and Curated Genomic Metadata
Source: Preprints.org preprint supplement (doi:10.20944/preprints202407.0837.v1), 2024-07-11
Supplement: Supplementary file 1 [file supplementary]

**Table S1:** BacSPaD genome metadata fields and their corresponding description.

| Metadata fields     | Description                                                                                                                                                                                                                                                                                                     |
|---------------------|-----------------------------------------------------------------------------------------------------------------------------------------------------------------------------------------------------------------------------------------------------------------------------------------------------------------|
| pathogenicity label | Labeling according to pathogenicity - either nonpathogenic to humans (NHP) or pathogenic to humans (HP).                                                                                                                                                                                                        |
| genome id           | Genome ID from Bacterial and Viral Bioinformatics Resource Center (BV-BRC) database.                                                                                                                                                                                                                            |
| genome name         | Genome name.                                                                                                                                                                                                                                                                                                    |
| strain              | Strain name according to National Center for Biotechnology Information (NCBI) taxonomy.                                                                                                                                                                                                                         |
| species             | Species name according to NCBI taxonomy.                                                                                                                                                                                                                                                                        |
| genus               | Genus name according to NCBI taxonomy.                                                                                                                                                                                                                                                                          |
| family              | Family name according to NCBI taxonomy.                                                                                                                                                                                                                                                                         |
| order               | Order name according to NCBI taxonomy.                                                                                                                                                                                                                                                                          |
| class               | Class name according to NCBI taxonomy.                                                                                                                                                                                                                                                                          |
| phylum              | Phylum name according to NCBI taxonomy.                                                                                                                                                                                                                                                                         |
| biosample accession | BioSample accession number ID from NCBI.                                                                                                                                                                                                                                                                        |
| taxon id            | Taxon ID from NCBI taxonomy.                                                                                                                                                                                                                                                                                    |
| serovar             | Taxonomy below subspecies; a variant which is usually based on its antigenic properties. Same as serotype ( <a href="https://www.ncbi.nlm.nih.gov/biosample/docs/attributes/">https://www.ncbi.nlm.nih.gov/biosample/docs/attributes/</a> ).                                                                    |
| biovar              | Variant distinguished by its unique biochemical or physiological traits ( <a href="https://www.ncbi.nlm.nih.gov/biosample/docs/attributes/">https://www.ncbi.nlm.nih.gov/biosample/docs/attributes/</a> ).                                                                                                      |
| pathovar            | Taxonomy below subspecies; a variety usually based on its pathogenic properties. Sometimes used as equivalent to subspecies. ( <a href="https://www.ncbi.nlm.nih.gov/biosample/docs/attributes/">https://www.ncbi.nlm.nih.gov/biosample/docs/attributes/</a> )                                                  |
| mlst                | Genotypic identifier based on housekeeping gene sequences.                                                                                                                                                                                                                                                      |
| other typing        | Strain typing or characterization methods beyond the standard approaches such as MLST (Multilocus Sequence Typing). Each 'genotype' followed by a number (e.g., genotype:1 or genotype:1903) denotes a unique genetic profile or pattern that has been identified in the microbial species under investigation. |
| culture collection  | Reference to a deposited microbial strain in a repository, identified by a unique accession number.                                                                                                                                                                                                             |
| type strain         | Indication if it is a type strain ('yes' or ''). A type strain is a nomenclatural standard for a particular bacterial species, serving as a reference point for its definition and identification.                                                                                                              |
| completion date     | Date of project completion.                                                                                                                                                                                                                                                                                     |

| Metadata fields      | Description                                                                                                                                                |
|----------------------|------------------------------------------------------------------------------------------------------------------------------------------------------------|
| publication          | Associated scientific publication identifier.                                                                                                              |
| bioproject accession | Unique identifier to corresponding project in NCBI.                                                                                                        |
| assembly accession   | Unique identifier to corresponding genome assembly in NCBI. Refers to a specific version of a genome assembly submitted to a database like NCBI's GenBank. |
| genbank accessions   | Unique identifier(s) of GenBank assembly/assemblies in NCBI.                                                                                               |
| refseq accessions    | Unique identifiers assigned to sequences within the Reference Sequence (RefSeq) database. RefSeq sequences are curated by NCBI staff and collaborators.    |
| sequencing centers   | Sequencing center (e.g. University 'x', Hospital 'y').                                                                                                     |
| sequencing platform  | Sequencing platform (e.g. Illumina, PacBio).                                                                                                               |
| sequencing depth     | Average number of times each nucleotide in a genome is sequenced.                                                                                          |
| assembly method      | Methodology used to assemble the genomic sequences.                                                                                                        |
| chromosomes          | Number of associated chromosomes.                                                                                                                          |
| plasmids             | Number of associated plasmids.                                                                                                                             |
| contigs              | Number of associated contigs.                                                                                                                              |
| genome length        | Genome length measured in base pairs (bp).                                                                                                                 |
| gc content           | Measure of the proportion of guanine (G) and cytosine (C) nucleotides in the DNA sequence, expressed as a percentage of the total nucleotide composition.  |
| patric cds           | Number of protein-coding sequences (CDS) annotated or sourced from PATRIC (previous version of BV-BRC).                                                    |
| refseq cds           | Number of protein-coding sequences (CDS) annotated or sourced from RefSeq database.                                                                        |
| isolation source     | Corresponding origin of isolation. This attribute provides information about the ecological niche or source of the bacterial strain.                       |
| isolation comments   | Additional notes or comments regarding the isolation of a specific bacterial strain.                                                                       |
| collection date      | Date on which a specific bacterial strain was collected or isolated from its source.                                                                       |
| isolation country    | Country associated with the biological sample isolation.                                                                                                   |
| geographic location  | Geographical descriptors associated with the biological sample isolation.                                                                                  |
| other environmental  | Supplementary attribute to describe specific environmental conditions or contexts associated with the biological sample.                                   |
| host gender          | Host gender.                                                                                                                                               |
| host age             | Host age.                                                                                                                                                  |
| host health          | Host health status or condition.                                                                                                                           |

| Metadata fields                   | Description                                                                                                                                                                                                                                                                                                                                                                                                                                                                                                                                        |
|-----------------------------------|----------------------------------------------------------------------------------------------------------------------------------------------------------------------------------------------------------------------------------------------------------------------------------------------------------------------------------------------------------------------------------------------------------------------------------------------------------------------------------------------------------------------------------------------------|
| body sample site                  | Specific anatomical site or location from which the biological sample was collected.                                                                                                                                                                                                                                                                                                                                                                                                                                                               |
| other clinical                    | Additional clinical information or metadata associated with the biological sample.                                                                                                                                                                                                                                                                                                                                                                                                                                                                 |
| antimicrobial resistance          | This field shows genomes that have been specifically tested against certain antibiotics and the resulting phenotype from that test. Note that a genome can have multiple antibiotic phenotypes, such as being resistant to one drug and susceptible to another. Values in this field include 'Resistant', 'Susceptible' or 'Intermediate' ( <a href="https://www.bv-brc.org/docs/quick_references/organisms_taxon/antimicrobial_resistance.html">https://www.bv-brc.org/docs/quick_references/organisms_taxon/antimicrobial_resistance.html</a> ). |
| antimicrobial resistance evidence | Indicates the information source behind the AMR designation. Allowable values include 'Computational Prediction', 'Computational Method', and 'AMR Panel' ( <a href="https://www.bv-brc.org/docs/quick_references/organisms_taxon/antimicrobial_resistance.html">https://www.bv-brc.org/docs/quick_references/organisms_taxon/antimicrobial_resistance.html</a> ).                                                                                                                                                                                 |
| gram stain bvbrc                  | Gram staining information ("positive" or "negative") sourced from BV-BRC.                                                                                                                                                                                                                                                                                                                                                                                                                                                                          |
| cell shape                        | Cell shape information (e.g. Bacilli, Cocci).                                                                                                                                                                                                                                                                                                                                                                                                                                                                                                      |
| motility                          | Motility information ("yes": motile, "no": non-motile).                                                                                                                                                                                                                                                                                                                                                                                                                                                                                            |
| temperature range                 | Indication on phenotype associated with range of temperature at which the organism is known to thrive, survive, or exhibit optimal growth (e.g. 'Mesophilic').                                                                                                                                                                                                                                                                                                                                                                                     |
| optimal temperature               | Optimal temperature at which the organism is known to exhibit optimal growth.                                                                                                                                                                                                                                                                                                                                                                                                                                                                      |
| oxygen requirement                | Specific oxygen conditions a microorganism requires to survive; Values include 'Aerobic', 'Anaerobic', 'Facultative', or 'Microaerophilic'.                                                                                                                                                                                                                                                                                                                                                                                                        |
| habitat                           | Natural or artificial habitat in which the bacteria resides or was found.                                                                                                                                                                                                                                                                                                                                                                                                                                                                          |
| disease                           | Host disease.                                                                                                                                                                                                                                                                                                                                                                                                                                                                                                                                      |
| comments                          | Supplementary information in form of comments providing further contextual details.                                                                                                                                                                                                                                                                                                                                                                                                                                                                |
| additional metadata               | Supplementary metadata providing further contextual details.                                                                                                                                                                                                                                                                                                                                                                                                                                                                                       |
| env broad scale                   | Broad-scale environmental context ( <a href="https://www.ncbi.nlm.nih.gov/biosample/docs/attributes/">https://www.ncbi.nlm.nih.gov/biosample/docs/attributes/</a> ).                                                                                                                                                                                                                                                                                                                                                                               |
| env local scale                   | Local-scale environmental context ( <a href="https://www.ncbi.nlm.nih.gov/biosample/docs/attributes/">https://www.ncbi.nlm.nih.gov/biosample/docs/attributes/</a> ).                                                                                                                                                                                                                                                                                                                                                                               |
| env medium                        | Environmental medium/material. keywords describing the material displaced by the entity during sampling ( <a href="https://www.ncbi.nlm.nih.gov/biosample/docs/attributes/">https://www.ncbi.nlm.nih.gov/biosample/docs/attributes/</a> ).                                                                                                                                                                                                                                                                                                         |
| isol growth condit                | Description or URL indication of isolation and growth condition specifications ( <a href="https://www.ncbi.nlm.nih.gov/biosample/docs/attributes/">https://www.ncbi.nlm.nih.gov/biosample/docs/attributes/</a> ).                                                                                                                                                                                                                                                                                                                                  |
| project name                      | A concise name that describes the overall project ( <a href="https://www.ncbi.nlm.nih.gov/biosample/docs/attributes/">https://www.ncbi.nlm.nih.gov/biosample/docs/attributes/</a> ).                                                                                                                                                                                                                                                                                                                                                               |
| pathogenicity details             | Additional bacterial strain information on pathogenicity (e.g. 'commensal', or 'diphtheria-like symptoms').                                                                                                                                                                                                                                                                                                                                                                                                                                        |
| host disease                      | Name of relevant disease, e.g. Salmonella gastroenteritis ( <a href="https://www.ncbi.nlm.nih.gov/biosample/docs/attributes/">https://www.ncbi.nlm.nih.gov/biosample/docs/attributes/</a> ).                                                                                                                                                                                                                                                                                                                                                       |
| host health state                 | Information regarding health state of the individual sampled at the time of sampling ( <a href="https://www.ncbi.nlm.nih.gov/biosample/docs/attributes/">https://www.ncbi.nlm.nih.gov/biosample/docs/attributes/</a> ).                                                                                                                                                                                                                                                                                                                            |
| host disease outcome              | Final outcome of disease, e.g., death, chronic disease, recovery.                                                                                                                                                                                                                                                                                                                                                                                                                                                                                  |

| Metadata fields           | Description                                                                                                                                                                                                       |
|---------------------------|-------------------------------------------------------------------------------------------------------------------------------------------------------------------------------------------------------------------|
| host description          | Additional host information not included in other defined vocabulary fields ( <a href="https://www.ncbi.nlm.nih.gov/biosample/docs/attributes/">https://www.ncbi.nlm.nih.gov/biosample/docs/attributes/</a> ).    |
| host disease stage        | Stage of disease at the time of sampling ( <a href="https://www.ncbi.nlm.nih.gov/biosample/docs/attributes/">https://www.ncbi.nlm.nih.gov/biosample/docs/attributes/</a> ).                                       |
| pathotype                 | Bacterial specific pathotype (e.g. <i>Escherichia coli</i> - STEC, UPEC) - <a href="https://www.ncbi.nlm.nih.gov/biosample/docs/attributes/">https://www.ncbi.nlm.nih.gov/biosample/docs/attributes/</a> .        |
| subsource note            | Subsource note. Further details about the origin, isolation method, or other relevant information regarding the sample used.                                                                                      |
| note                      | Additional note. This can include details about the source of the sequence, experimental conditions, characteristics of the organism, or any other relevant information.                                          |
| description               | Further details on isolation source or organism.                                                                                                                                                                  |
| biotic relationship       | Observed biotic relationship ('free living', 'parasite', 'commensal', 'symbiont') - <a href="https://www.ncbi.nlm.nih.gov/biosample/docs/attributes/">https://www.ncbi.nlm.nih.gov/biosample/docs/attributes/</a> |
| biome                     | Major environment type(s) where sample was collected ( <a href="https://www.ncbi.nlm.nih.gov/biosample/docs/attributes/">https://www.ncbi.nlm.nih.gov/biosample/docs/attributes/</a> ).                           |
| host status               | Information on host health status.                                                                                                                                                                                |
| risk group                | Risk group classification - based on their potential hazard to human health and the environment (species-level, ranges from 1 to 3; 3 representing the highest hazard).                                           |
| Note on infection mode    | Further details on infection mode.                                                                                                                                                                                |
| checkm compl final        | Genome completeness (%) according to CheckM tool v1.1.6.                                                                                                                                                          |
| checkm contam final       | Genome contamination (%) according to CheckM tool v1.1.6.                                                                                                                                                         |
| disease category          | Disease category (e.g. Respiratory diseases).                                                                                                                                                                     |
| disease subcategory       | Subcategory of the main disease category (e.g. Pneumonia). When the specific infectious disease name is not available, an associated keyword is given instead (e.g. Pertussis).                                   |
| isolation source category | Isolation source category (e.g. Respiratory tract).                                                                                                                                                               |
| disease comb              | Combination of the disease category and disease subcategory (e.g. Respiratory diseases - Pneumonia).                                                                                                              |

**Figure S1:** Summary of the steps applied for the pre-processing phase, including filtration and refinement of bacterial genomes data and respective labeling phase.

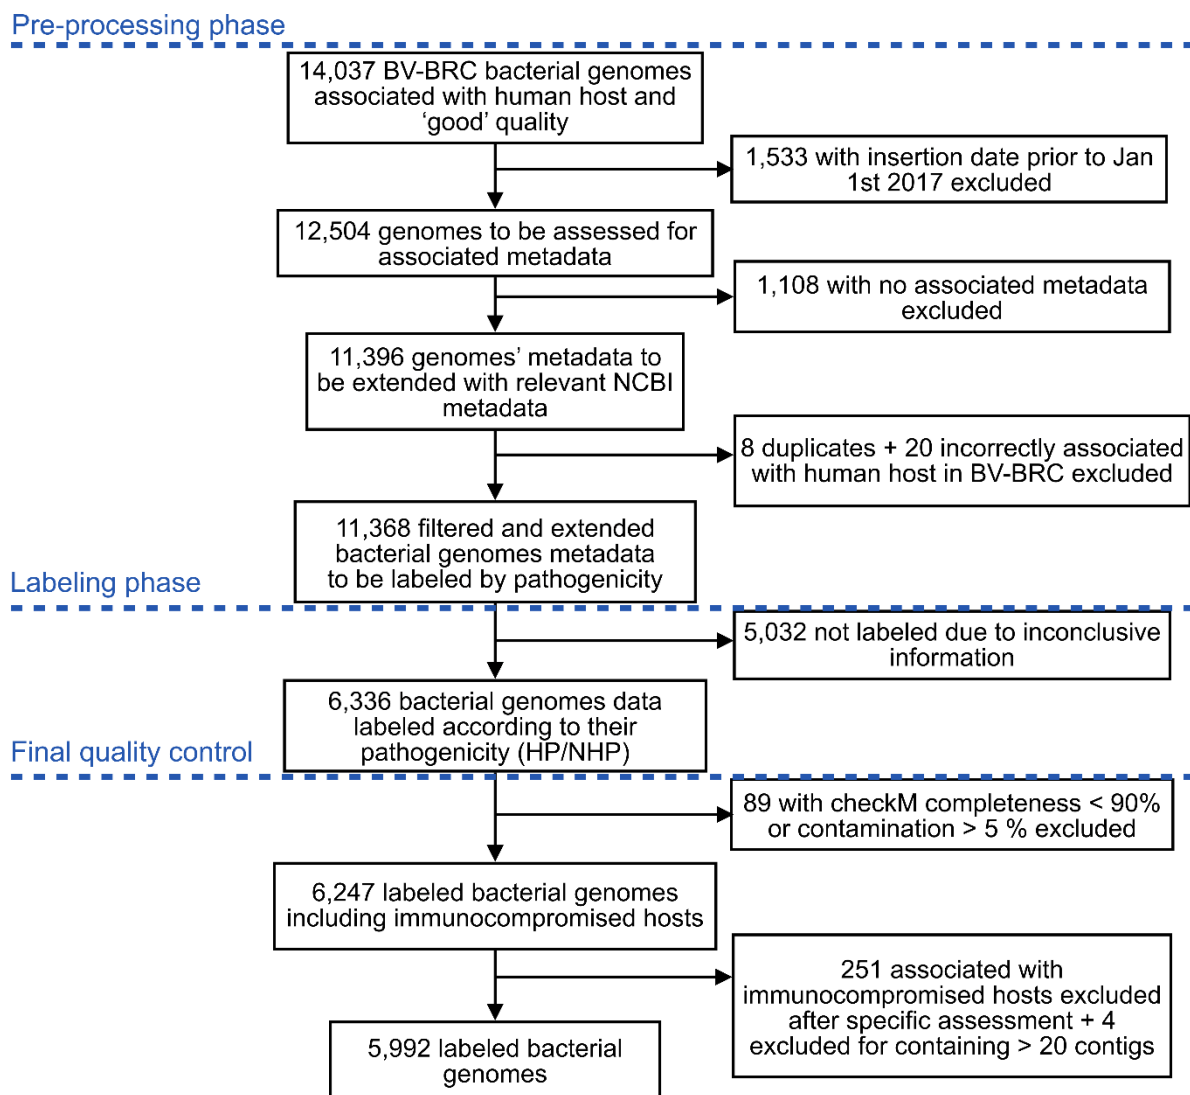

**List S1:** Final list of keywords associated with immunocompromised hosts

'immunocompromised', 'diabetes', 'cancer', 'HIV', 'AIDS', 'leukemia', 'carcinoma', 'Guillain', 'interleukin-12 receptor deficiency'.

**List S2:** Final list of HP keywords

'virulence', 'superbug', 'waterborne', 'foodborne', 'outbreak', 'infection', 'pathogen', 'water borne', 'food borne', keywords with suffix "-itis", 'poisoning', 'infectious', 'sepsis', 'infected', 'biofilm', 'purulent', 'pus', 'death', 'severe', 'diseased', 'pandemic',

‘epidemic’, ‘transmission’, ‘vector’, ‘toxin’, ‘toxic’, ‘clinical’, ‘biosafety level 2’, ‘hypervirulent’, ‘diarrhea’, ‘intensive’.

**List S3:** Final list of HP exclusion keywords

‘Healthy’, ‘probiotic’, ‘commensal’, ‘microbiome’, ‘microbiota’, ‘nutraceutical’, ‘normal’, ‘asymptomatic’, ‘naturally occurring’, ‘human-associated habitat’, ‘opportunistic’.

**Table S2:** Final list of infectious disease keywords and their frequency

| Infectious disease or associated keyword | Frequency |
|------------------------------------------|-----------|
| bacteremia                               | 199       |
| tuberculosis                             | 134       |
| pneumonia                                | 109       |
| gonorrhoea                               | 65        |
| whooping cough                           | 64        |
| brucellosis                              | 51        |
| gastric ulcer                            | 36        |
| uti                                      | 36        |
| gonorrhea                                | 27        |
| clostridium difficile                    | 23        |
| syphilis                                 | 23        |
| compound ulcer                           | 18        |
| pertussis                                | 17        |
| listeriosis                              | 16        |
| shigellosis                              | 13        |
| tularemia                                | 11        |
| bacterial vaginosis                      | 10        |

| Infectious disease or associated keyword      | Frequency |
|-----------------------------------------------|-----------|
| fever                                         | 9         |
| meliodosis                                    | 9         |
| septicemia                                    | 9         |
| diphtheria                                    | 8         |
| pneumoniae                                    | 8         |
| typhoid fever                                 | 8         |
| abscess                                       | 7         |
| liver abscess                                 | 7         |
| salmonellosis                                 | 7         |
| bacteraemia                                   | 6         |
| salmonella                                    | 6         |
| bartonella quintana                           | 5         |
| cholera                                       | 5         |
| duodenal ulcer                                | 5         |
| scarlet fever                                 | 5         |
| septicaemia                                   | 5         |
| actinomycetoma                                | 4         |
| febrile illness after i. scapularis tick-bite | 4         |
| hemolytic-uremic syndrome                     | 4         |
| human bacteremia with s. aureus               | 4         |
| mycobacterium tuberculosis                    | 4         |
| bacterimia                                    | 3         |
| botulism                                      | 3         |
| dental caries                                 | 3         |

| Infectious disease or associated keyword | Frequency |
|------------------------------------------|-----------|
| human bacteremia with s. aureus (mrsa)   | 3         |
| rheumatic fever                          | 3         |
| salmonella gastroenteritis               | 3         |
| septic shock                             | 3         |
| skin sore / abscess / burns / iv site    | 3         |
| urine infection                          | 3         |
| bejel                                    | 2         |
| glanders                                 | 2         |
| gonorrhoeae                              | 2         |
| lemierre's syndrome                      | 2         |
| leptospirosis                            | 2         |
| nosocomial infection                     | 2         |
| pnuemonia                                | 2         |
| rocky mountain spotted fever             | 2         |
| ventilator-associated pneumonia          | 2         |
| yaws                                     | 2         |
| a. baumannii bacteremia                  | 1         |
| abdominal abscess                        | 1         |
| abscess neck                             | 1         |
| acinetobacter infections                 | 1         |
| acute leukemia, pneumonia                | 1         |
| anthrax                                  | 1         |
| atrophic gastic                          | 1         |
| bacteremia without focus                 | 1         |



| Infectious disease or associated keyword | Frequency |
|------------------------------------------|-----------|
| bacterial pneumonia                      | 1         |
| bilateral pneumonia                      | 1         |
| blood                                    | 1         |
| blood stream                             | 1         |
| brain congestion                         | 1         |
| bronchial granuloma                      | 1         |
| bsi                                      | 1         |
| cepacia syndrome                         | 1         |
| copd                                     | 1         |
| corneal ulcer                            | 1         |
| dysentery                                | 1         |
| eczema herpeticum                        | 1         |
| endemic syphilis                         | 1         |
| enteric fever                            | 1         |
| erysipelas                               | 1         |
| erysipeloid                              | 1         |
| facial abscessus                         | 1         |
| far east scarlet-like fever              | 1         |
| fatal septicaemia                        | 1         |
| fever of unknown origin                  | 1         |
| gastric ulcers                           | 1         |
| gbs infection                            | 1         |
| gluteal abscess                          | 1         |
| healthcare-associated pneumonia          | 1         |

| Infectious disease or associated keyword   | Frequency |
|--------------------------------------------|-----------|
| hip abscess                                | 1         |
| hiv; cat scratch disease                   | 1         |
| infant botulism                            | 1         |
| infection                                  | 1         |
| infenction                                 | 1         |
| interstitial pneumonia                     | 1         |
| liver abscessus                            | 1         |
| localized aggressive periodontitis         | 1         |
| lung abscess                               | 1         |
| lyme borreliosis                           | 1         |
| mac pneumonia, hiv                         | 1         |
| mediastinal abscess                        | 1         |
| periapical abscess                         | 1         |
| perisplenic abscess                        | 1         |
| pneamonia                                  | 1         |
| pneumococcal disease                       | 1         |
| pneumonia and bacteremia                   | 1         |
| pneumonia, bacterial                       | 1         |
| polysegmental community acquired pneumonia | 1         |
| refractory periapical abscess              | 1         |
| rickettsiosis                              | 1         |
| secondary tuberculosis                     | 1         |
| septic shock, multiple organ failure       | 1         |
| skin abscess                               | 1         |

| Infectious disease or associated keyword                             | Frequency |
|----------------------------------------------------------------------|-----------|
| soft tissue infection                                                | 1         |
| spastic tetraplegia. chronic right-sided pneumonia,<br>exacerbation. | 1         |
| stec infection                                                       | 1         |
| urinary tract infection                                              | 1         |
| yersiniosis                                                          | 1         |

**List S4:** Final list of NHP keywords

‘Healthy’, ‘probiotic’, ‘Commensal’, ‘microbiome’, ‘microbiota’, ‘symbiotic’,  
‘nutraceutical’, “normal”, ‘commercial’, ‘flora’.

**List S5:** Final list of NHP exclusion keywords

‘patient’, ‘abscess’, ‘wound’, ‘bacteremia’, ‘pneumonia’, ‘ICU’, ‘disease’,  
‘contaminated’, ‘symptom’, ‘clinic’.
